# Supplementary material for: Amygdala Response to Preattentive Masked Fear in Children With Conduct Problems: The Role of Callous-Unemotional Traits
Source: Atypon-hosted journal article supplement (doi:10.1176/appi.ajp.2012.12020191), 2012-10-01
Supplement: 1109_ds001.pdf [file 1109_ds001.pdf]

Data Supplement for Viding et al., “Association of Amygdala Response to Preattentive Masked Fear With Callous-Unemotional Traits in Children With Conduct Problems,” Am J Psychiatry (doi: 10.1176/appi.ajp.2012.12020191)

**TABLE S1. Combined parent and teacher ratings for the Strengths and Difficulties Questionnaire, taken during participant screening**

| Strengths and Difficulties Questionnaire | Group                      |      |                                                                 |      |                                                                     |      | Analysis |           |
|------------------------------------------|----------------------------|------|-----------------------------------------------------------------|------|---------------------------------------------------------------------|------|----------|-----------|
|                                          | 1) Control group<br>(N=16) |      | 2) Conduct problems/Low<br>callous unemotional traits<br>(N=15) |      | 3) Conduct<br>problems/High callous<br>unemotional traits<br>(N=15) |      |          |           |
|                                          | Mean                       | SD   | Mean                                                            | SD   | Mean                                                                | SD   | p        | Post hoc* |
| Conduct problems                         | 1.06                       | 1.24 | 5.93                                                            | 1.39 | 8.20                                                                | 1.47 | 0.001    | 1<2<3     |
| Hyperactivity/Inattention                | 3.81                       | 2.20 | 7.53                                                            | 2.17 | 8.80                                                                | 1.42 | 0.001    | 1<(2,3)   |
| Peer Relationship Problems               | 2.31                       | 1.25 | 3.27                                                            | 2.96 | 4.67                                                                | 2.97 | 0.041    | 1<3       |
| Emotional symptoms                       | 2.25                       | 1.57 | 4.00                                                            | 3.21 | 4.73                                                                | 2.69 | 0.028    | 1<3       |
| Prosocial behavior                       | 9.56                       | 0.63 | 7.47                                                            | 1.81 | 6.40                                                                | 2.16 | 0.001    | 1<(2,3)   |
| Total difficulties                       | 9.44                       | 3.69 | 20.73                                                           | 6.24 | 26.80                                                               | 6.34 | 0.001    | 1<2<3     |

\*p<0.05, Bonferroni corrected

**TABLE S2. The effect of controlling for participant symptom counts on the cluster reported in the main text in right amygdala showing the pattern: conduct problems with low callous-unemotional traits>controls>conduct problems with low callous-unemotional traits. Voxels displayed survive familywise error correction at p<0.05 within a bilateral amygdala mask.**

| Covariate (symptom counts, N=46)         | Peak amygdala voxel |    |     | t    | z    | k  |
|------------------------------------------|---------------------|----|-----|------|------|----|
| No Covariate                             | 20                  | -2 | -22 | 3.85 | 3.55 | 9  |
| Conduct Disorder                         | 20                  | -2 | -22 | 3.97 | 3.65 | 9  |
| Attention Deficit Hyperactivity Disorder | 20                  | -2 | -22 | 4.24 | 3.85 | 16 |
| Generalized Anxiety Disorder             | 20                  | -2 | -22 | 4.05 | 3.70 | 14 |
| Major Depressive Episode <sup>a</sup>    | 20                  | -2 | -22 | 3.60 | 3.34 | 4  |

<sup>a</sup>Missing data from one participant with conduct problems  
x y z=peak voxel MNI coordinates; k=cluster size (2×2×2 mm voxels).

**TABLE S3. Significant cluster at  $p < 0.001$ , uncorrected,  $k \geq 5$ , showing the pattern conduct problems with low callous-unemotional trait > controls > conduct problems with low callous-unemotional traits, and the reverse, for Fear-Calm.**

| Brain Region                                                                                                 | BA | L/R | x   | y   | z   | peak t | peak z | k    |
|--------------------------------------------------------------------------------------------------------------|----|-----|-----|-----|-----|--------|--------|------|
| conduct problems/low callousunemotional traits > Controls > Coduct problems/high callousunemotional trait    |    |     |     |     |     |        |        |      |
| Cerebellum, posterior lobe                                                                                   |    | L   | -28 | -70 | -22 | 4.34   | 3.94   | 1.42 |
| Amygdala                                                                                                     |    | R   | 20  | -2  | -22 | 3.85   | 3.55   | 9    |
| Occipital cortex                                                                                             | 18 | R   | 18  | -84 | -16 | 3.62   | 3.36   | 6    |
| Dorsolateral prefrontal cortex                                                                               | 46 | R   | 48  | 38  | 26  | 3.37   | 3.16   | 5    |
| Middle frontal gyrus                                                                                         | 8  | L   | -40 | 24  | 44  | 3.37   | 3.16   | 5    |
| Conduct problems/low callousunemotional traits < Controls < Conduct problems/high callous-unemotional traits |    |     |     |     |     |        |        |      |
| Middle temporal gyrus                                                                                        | 20 | R   | 40  | -18 | -20 | 4.55   | 4.10   | 31   |
| Precentral gyrus                                                                                             | 6  | L   | -38 | -12 | 40  | 4.21   | 3.84   | 73   |
| Uncus                                                                                                        | 20 | R   | 30  | -10 | -32 | 3.95   | 3.64   | 33   |
| Cerebellum, anterior lobe                                                                                    |    | R   | 14  | -40 | -30 | 3.65   | 3.39   | 10   |
| Superior frontal gyrus                                                                                       | 9  | L   | -16 | 34  | 40  | 3.63   | 3.37   | 16   |
| Midcingulate gyrus                                                                                           | 24 | R   | 12  | 8   | 34  | 3.61   | 3.36   | 8    |
| Fusiform gyrus                                                                                               | 20 | L   | -36 | -8  | 28  | 3.61   | 3.36   | 9    |

BA=Brodman Area; L/R=Left/Right; x y z=peak voxel MNI coordinates; k=cluster size (2x2x2mm voxels).

**TABLE S4. Significant clusters at  $p < 0.001$ , uncorrected,  $k \geq 5$ , showing a correlation between callous-unemotional trait scores and neural responses to Fear-Calm in children with conduct problems.**

| Brain Region               | BA | L/R | x   | y   | z   | peak t | peak z | k  |
|----------------------------|----|-----|-----|-----|-----|--------|--------|----|
| Negative Relationship      |    |     |     |     |     |        |        |    |
| Caudate tail               | —  | R   | 22  | -44 | 12  | 5.21   | 4.32   | 32 |
| Middle frontal gyrus       | 46 | R   | 46  | 38  | 28  | 4.14   | 3.62   | 34 |
| Occipital cortex           | 19 | L   | -36 | -82 | -4  | 4.12   | 3.61   | 73 |
|                            |    |     | -24 | -88 | -12 | 4.09   | 3.59   |    |
| Occipital cortex           | 17 | L   | -20 | -82 | 4   | 4.02   | 3.54   | 7  |
| Clastrum                   | —  | L   | -34 | -24 | -6  | 3.82   | 3.40   | 9  |
| Cerebellum, posterior lobe | —  | L   | -30 | -70 | -22 | 3.78   | 3.37   | 44 |
|                            |    |     | -38 | -72 | -18 | 3.56   | 3.20   |    |
| Positive Relationship      |    |     |     |     |     |        |        |    |
| Parahippocampal gyrus      | 28 | R   | 28  | -10 | -32 | 4.10   | 3.60   | 14 |
| Inferior temporal gyrus    | 21 | R   | 42  | -8  | -34 | 4.00   | 3.53   | 11 |

BA=Brodman Area; L/R = Left/Right; x y z = peal voxel MNI coordinates; k = cluster size (2x2x2 mm voxels).
